# Supplementary material
Source: publisher figshare collection journal article supplement (https://acs.figshare.com/ndownloader/files/4448035)
Supplement: Supplementary file 1 [file 4448035]

## Supporting Information

### **New Zinc Germanates Incorporating Organic Amine Ligands: Solvothermal Synthesis and Structural Characterization of $\text{Zn}_2\text{Ge}_4\text{O}_{10}(\text{NH}_2\text{CH}_2\text{CH}_2\text{CH}_2\text{NH}_2)$ and $\text{ZnGe}_2\text{O}_5(\text{NH}_2\text{CH}_2\text{CH}_2\text{NH}_2)$**

**Chih-Min Wang,<sup>a</sup> Chia-Hui Lin,<sup>a</sup> Ciao-Wei Yang,<sup>a</sup> and Kwang-Hwa Lii<sup>a,b,\*</sup>**

<sup>a</sup>*Department of Chemistry, National Central University, Jhongli, Taiwan 320*

<sup>b</sup>*Institute of Chemistry, Academia Sinica, Nankang, Taipei, Taiwan 115*

\*To whom correspondence should be addressed.

**Figure S1.** Experimental (bottom) and simulated (top) X-ray powder patterns of  $\text{Zn}_2\text{Ge}_4\text{O}_{10}(\text{NH}_2\text{CH}_2\text{CH}_2\text{CH}_2\text{NH}_2)$  (compound **1**).

**Figure S2.** Experimental (bottom) and simulated (top) X-ray powder patterns of  $\text{ZnGe}_2\text{O}_5(\text{NH}_2\text{CH}_2\text{CH}_2\text{NH}_2)$  (compound **2**).

**Figure S3.** Infrared spectrum of **1** (KBr pellet method)

**Figure S4.** Infrared spectrum of **2** (KBr pellet method)

**Figure S5.** Thermogravimetric analysis of compound **1** in flowing  $\text{N}_2$  at  $10\text{ }^\circ\text{C min}^{-1}$  from 40 to  $1000\text{ }^\circ\text{C}$ .

**Figure S6.** Thermogravimetric analysis of compound **2** in flowing  $\text{N}_2$  at  $10\text{ }^\circ\text{C min}^{-1}$  from 40 to  $1000\text{ }^\circ\text{C}$ .

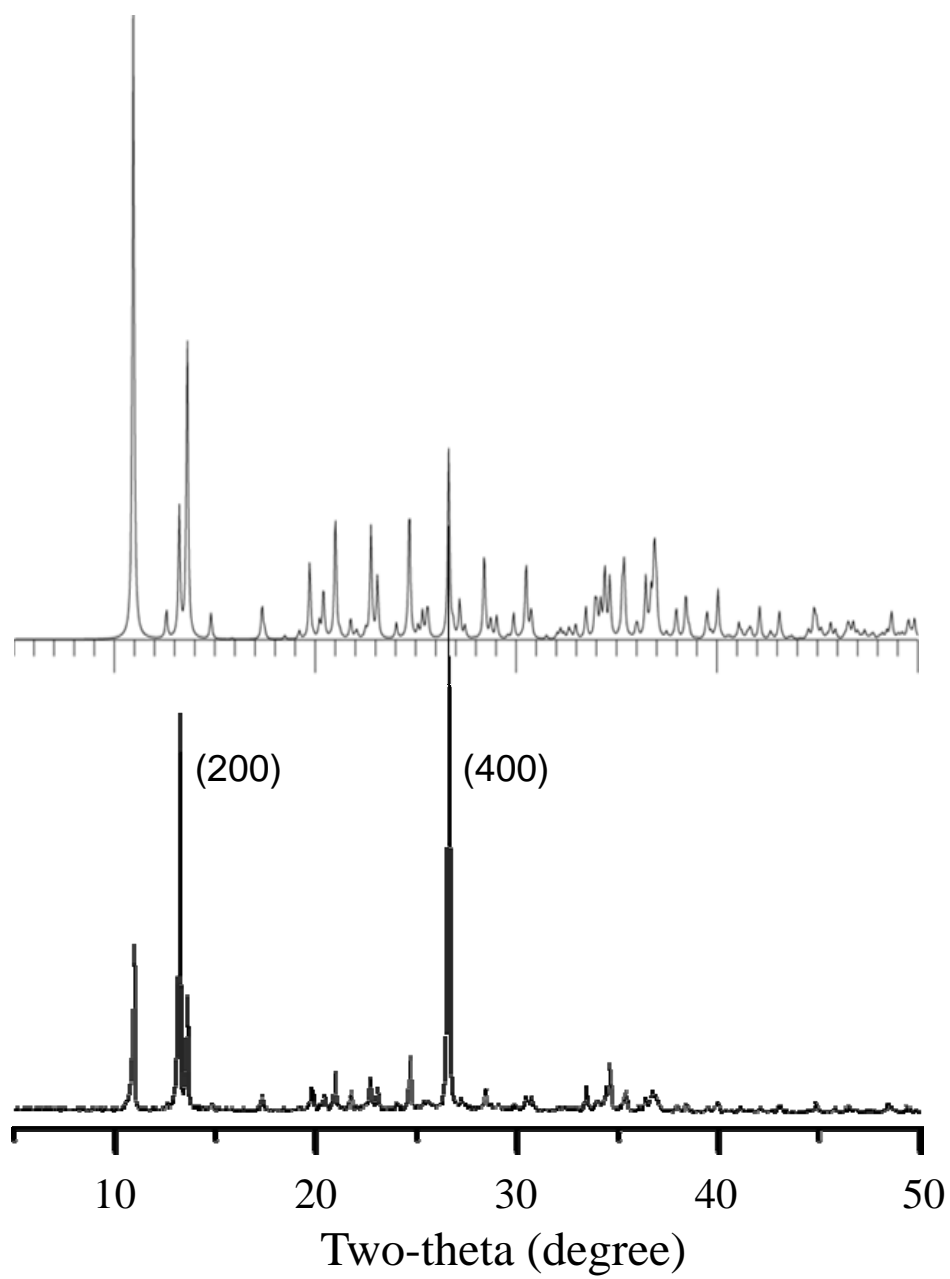

Figure S1

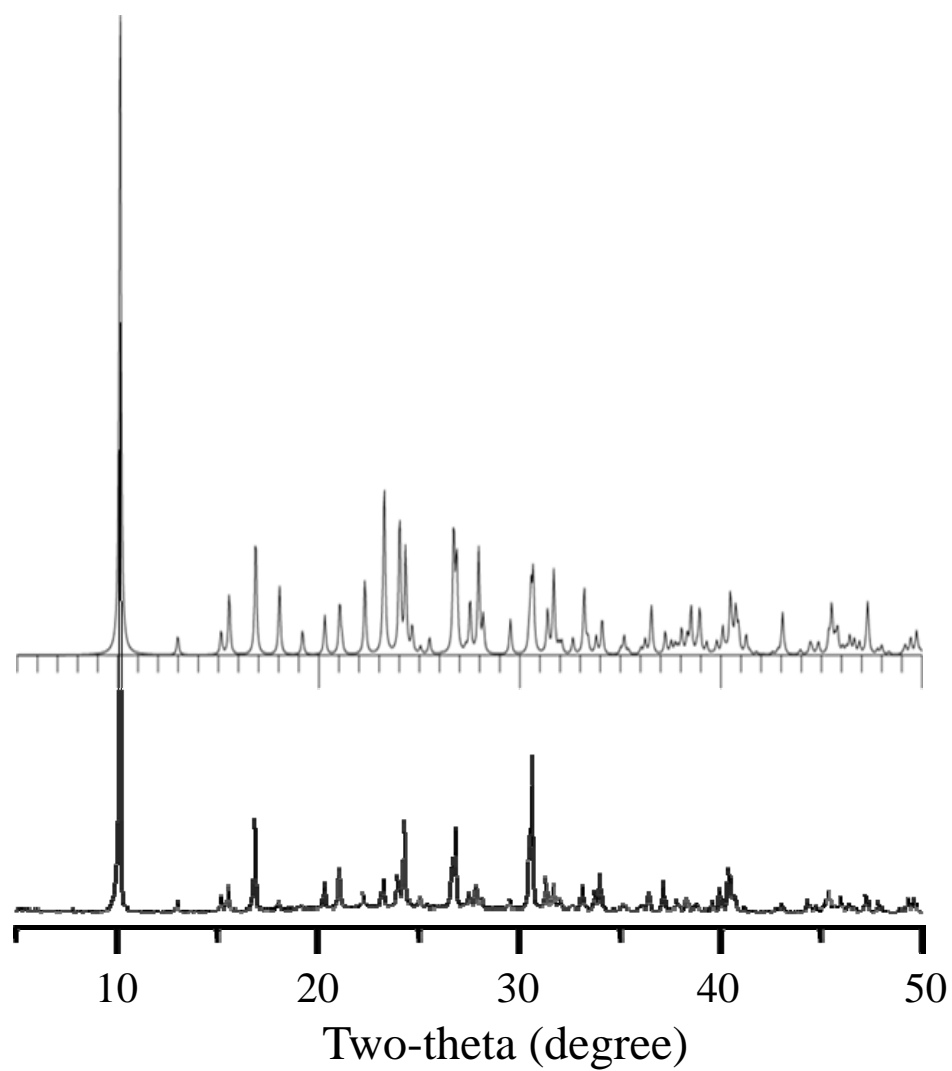

Figure S2

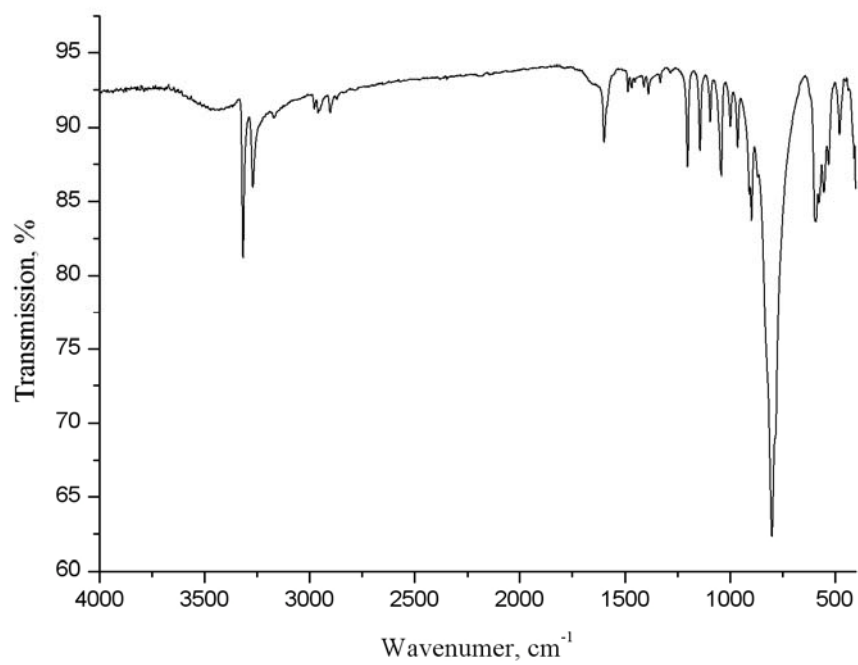

Figure S3

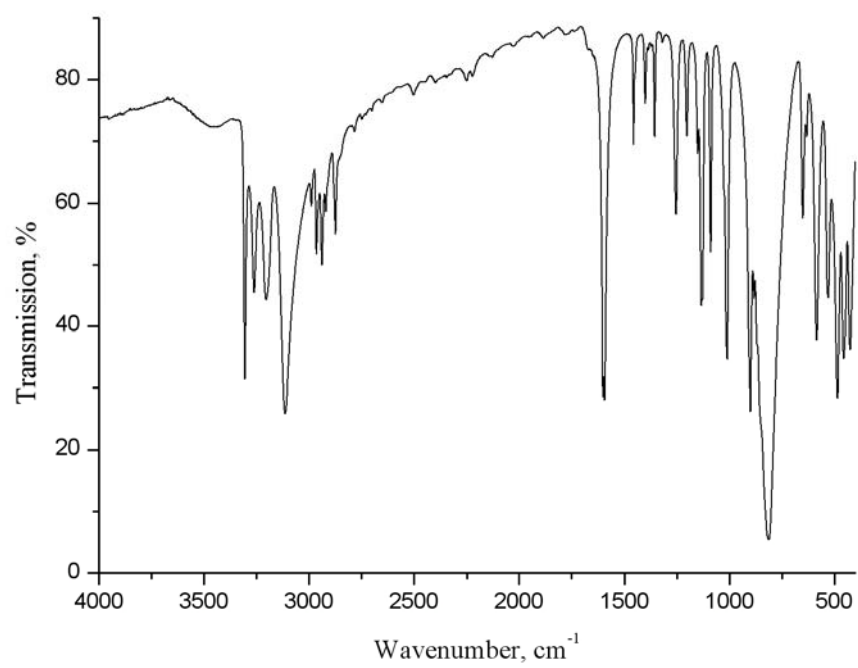

Figure S4

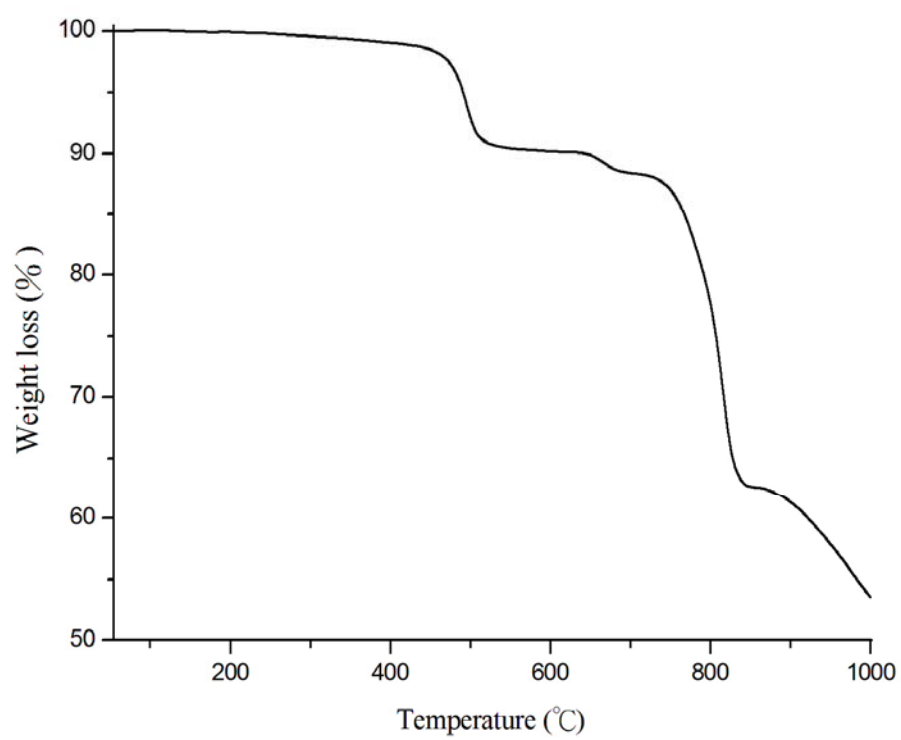

Figure S5

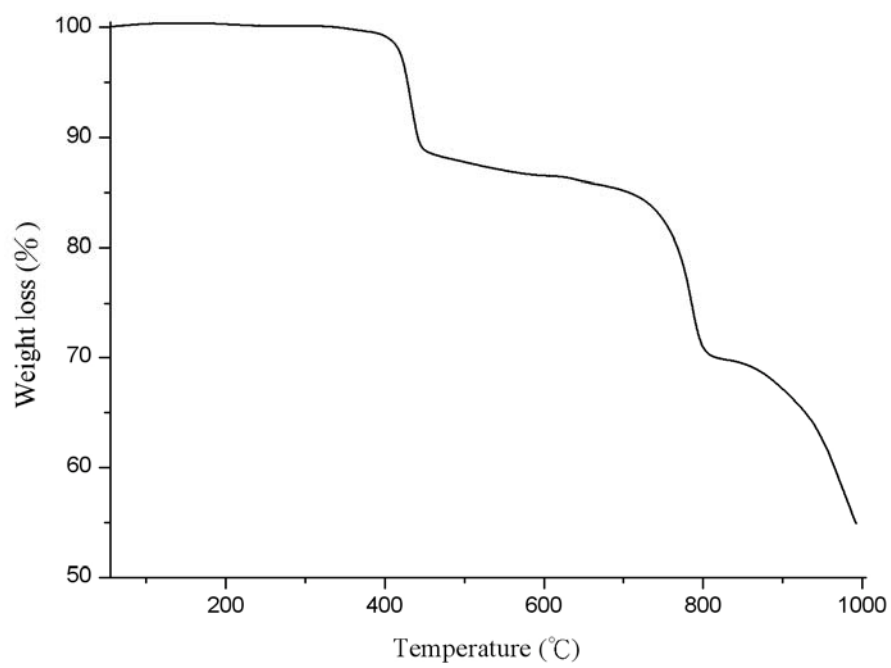

Figure S6
